# Supplementary material
Source: HighWire-hosted journal article supplement (https://gut.bmj.com/content/72/6/1081)
Supplement: inline-supplementary-material-7 [file inline-supplementary-material-7.pdf]

**Table S1. Histological grading of colitis**

| Feature graded        | Grade | Description                      |
|-----------------------|-------|----------------------------------|
| Inflammation severity | 0     | None                             |
|                       | 1     | Slight                           |
|                       | 2     | Moderate                         |
|                       | 3     | Severe                           |
| Inflammation extent   | 0     | None                             |
|                       | 1     | Mucosa                           |
|                       | 2     | Mucosa and submucosa             |
| Crypt damage          | 3     | Transmural                       |
|                       | 0     | None                             |
|                       | 1     | Basal 1/3 damaged                |
|                       | 2     | Basal 2/3 damaged                |
| Percent involvement   | 3     | Only surface epithelium lost     |
|                       | 4     | Entire crypt and epithelium lost |
|                       | 1     | 1-25%                            |
|                       | 2     | 26-50%                           |
|                       | 3     | 51-75%                           |
|                       | 4     | 76-100%                          |

For each feature, the product of the grade and the percentage involvement was established. The histological score was obtained by adding the subscores of each feature.
