# Supplementary material
Source: HighWire-hosted journal article supplement (https://gut.bmj.com/content/72/6/1081)
Supplement: inline-supplementary-material-9 [file inline-supplementary-material-9.pdf]

**Table S3. Characteristics of IBD patients**

|                        | Control IBD patients | CARD9 IBD patients | Healthy subjects |
|------------------------|----------------------|--------------------|------------------|
| <i>Number</i>          | 11                   | 8                  | 6                |
| <i>Age (years)</i>     | 40.5 ±8              | 48 ±7.6            | 33.7 ±5.9        |
| <i>% Male</i>          | 5 (55.5%)            | 4 (50%)            | 2 (33.3%)        |
| <i>Treatment</i>       |                      |                    |                  |
| oral-5-ASA (%)         | 4 (36%)              | 2 (25%)            | 0                |
| anti-TNF (%)           | 10 (90%)             | 7 (87.5%)          | 0                |
| anti-integrin α4β7 (%) | 1 (10%)              | 1 (12.5%)          | 0                |
| methotrexate (%)       | 2 (18%)              | 1 (12.5%)          | 0                |

Cohort characteristics in terms of age, sex and treatment. Numeric data are summarized as mean ± s.d.

Sampling and analysis performed between 01/2022 and 04/2022.
